# Supplementary material for: mRNA booster vaccination protects aged mice against the SARS-CoV-2 Omicron variant
Source: PubMed Central journal article supplement (PMC9357006; doi:10.1038/s42003-022-03765-3), 2022-08-06
Supplement: 42003_2022_3765_MOESM3_ESM.pdf [file 42003_2022_3765_MOESM3_ESM.pdf]

## Description of Additional Supplementary Files

**File name:** Supplementary Data 1

**Description:** The source data behind the graphs in the paper.
