# Supplementary material for: mRNA booster vaccination protects aged mice against the SARS-CoV-2 Omicron variant
Source: Commun Biol. 2022 Aug 6;5:790. doi: 10.1038/s42003-022-03765-3 (PMC9357006; doi:10.1038/s42003-022-03765-3)
Supplement: Supplementary file 2 — Supplementary Material [file 42003_2022_3765_MOESM2_ESM.pdf]

## Supplementary Material for

### “mRNA booster vaccination protects aged mice against the SARS-CoV-2 Omicron variant”

Etsuro Nanishi<sup>1,2†</sup>, Marisa E. McGrath<sup>3†</sup>, Timothy R. O’Meara<sup>1</sup>, Soumik Barman<sup>1,2</sup>, Jingyou Yu<sup>4</sup>, Huahua Wan<sup>4</sup>, Carly A. Dillen<sup>3</sup>, Manisha Menon<sup>1</sup>, Hyuk-Soo Seo<sup>5,6</sup>, Kijun Song<sup>5</sup>, Andrew Z Xu<sup>5</sup>, Luke Sebastian<sup>5</sup>, Byron Brook<sup>1,2</sup>, Anna-Nicole Bosco<sup>1</sup>, Francesco Borriello<sup>1,2,7,φ</sup>, Robert K. Ernst<sup>8</sup>, Dan H. Barouch<sup>4</sup>, Sirano Dhe-Paganon<sup>5,6</sup>, Ofer Levy<sup>1,2,9††</sup>, Matthew B. Frieman<sup>3††</sup>, David J. Dowling<sup>1,2††</sup>

<sup>1</sup>) *Precision Vaccines Program*, Division of Infectious Diseases, Boston Children’s Hospital, Boston, MA, USA.

<sup>2</sup>) Department of Pediatrics, Harvard Medical School, Boston, MA, USA.

<sup>3</sup>) Department of Microbiology and Immunology, The Center for Pathogen Research, University of Maryland School of Medicine, Baltimore, MD, USA.

<sup>4</sup>) Center for Virology and Vaccine Research, Beth Israel Deaconess Medical Center, Harvard Medical School, Boston, MA, USA.

<sup>5</sup>) Department of Cancer Biology, Dana-Farber Cancer Institute, Boston, MA, USA.

<sup>6</sup>) Department of Biological Chemistry and Molecular Pharmacology, Harvard Medical School, Boston, MA, USA.

<sup>7</sup>) Division of Immunology, Boston Children’s Hospital, Boston, MA, USA.

<sup>8</sup>) Department of Microbial Pathogenesis, University of Maryland School of Dentistry, Baltimore, MD, USA.

<sup>9</sup>) Broad Institute of MIT & Harvard, Cambridge, MA, USA.

φ Present address: Generate Biomedicines, Cambridge, MA, USA.

†These authors contributed equally to this manuscript.

††These authors jointly supervised this work.

**\*Corresponding author:** David J Dowling, *Precision Vaccines Program*, Division of Infectious Diseases, Boston Children’s Hospital; Harvard Medical School, 4 Blackfan Circle, Harvard Institutes of Medicine, Rm 842, Boston, MA 02115, USA. Tel: +1 617-919-6890. e-mail: david.dowling@childrens.harvard.edu

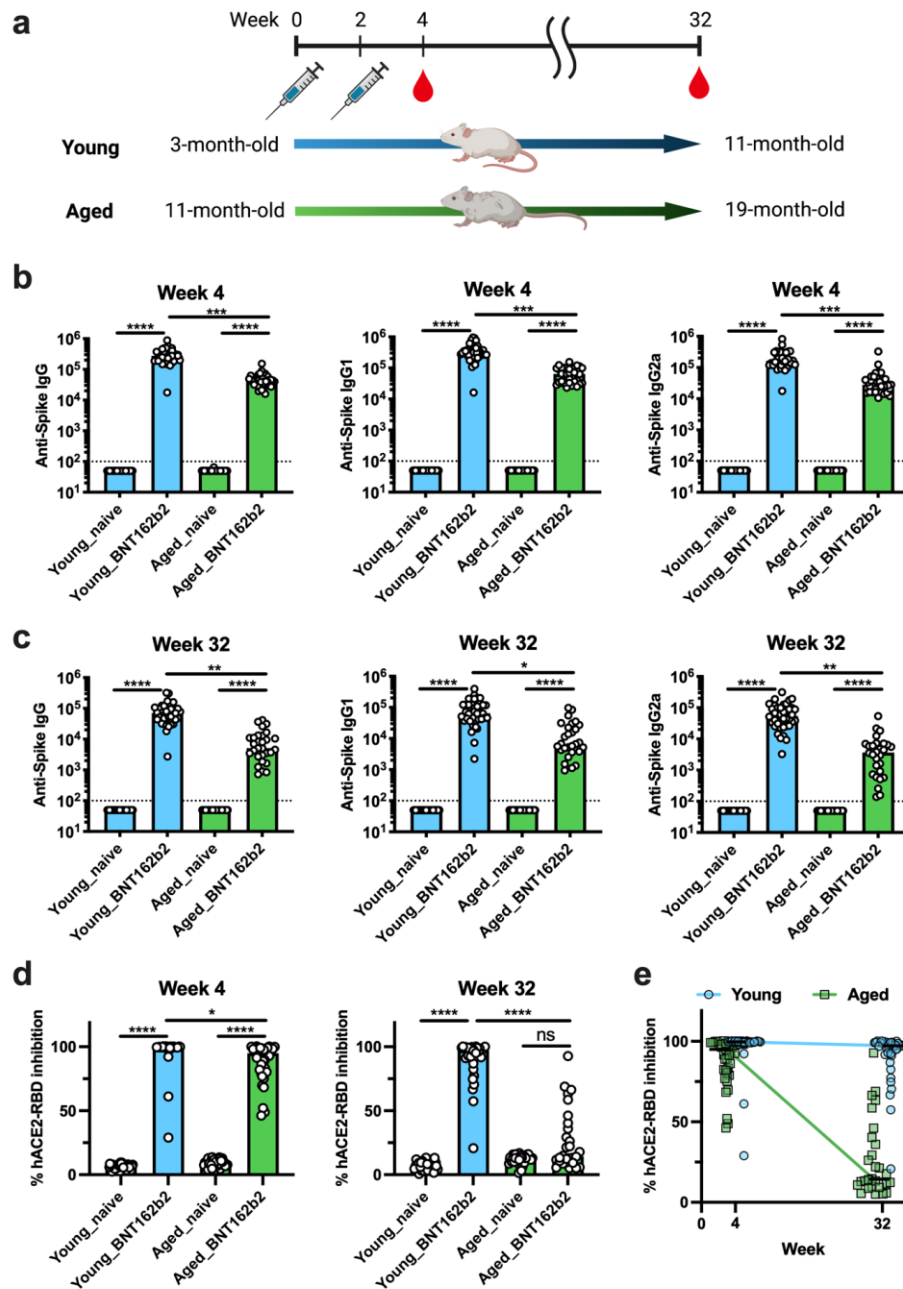

### Supplementary Figure 1. Vaccine-induced humoral immune responses wane in 19-month-old mice at 32 weeks after 2-dose mRNA BNT162b2 immunization

Three- and 11-month-old BALB/c mice were immunized with 1  $\mu$ g of mRNA BNT162b2 on weeks 0 and 2. Serum samples were collected at weeks 4 and 32 (a). Anti-spike IgG, IgG1, and IgG2a were assessed on week 4 (b) and week 32 (c), and (d-e) hACE2-RBD inhibition rate was assessed at both timepoints. N=39–40 per group for week 4 and N=28–40 per group for week 32. Results are presented as median. Each symbol represents an individual sample. Data were analyzed by Kruskal-Wallis test corrected for multiple comparisons. \* $P$  < 0.05, \*\* $P$  < 0.01, \*\*\* $P$  < 0.001, \*\*\*\*  $P$  < 0.0001. Dashed lines represent lower limit of detection. The graphic in Supplementary Figure 1a was created with BioRender.com.

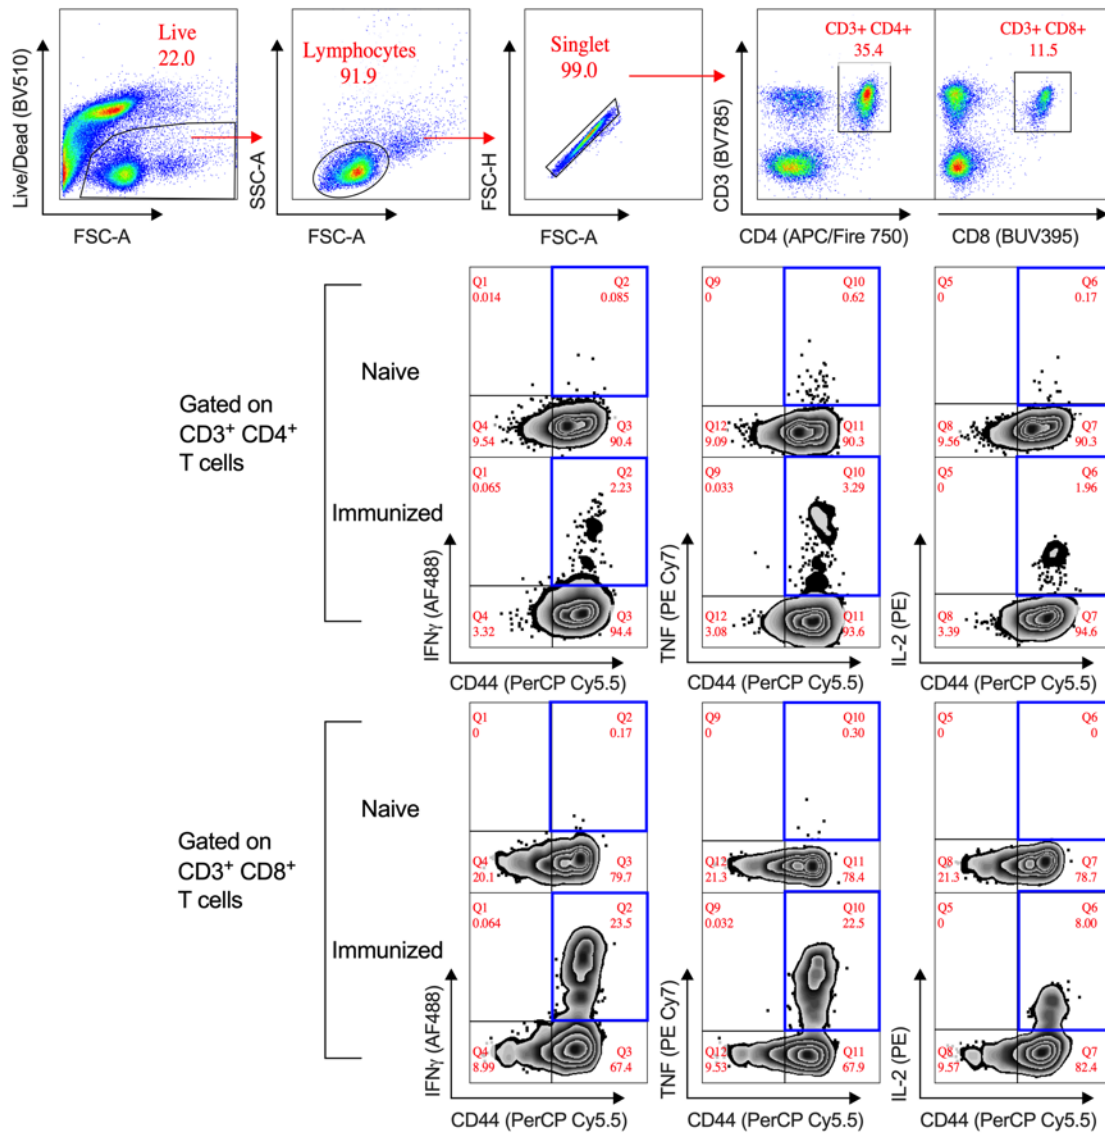

**Supplementary Figure 2. *Ex vivo* flow cytometry gating strategy post murine mRNA vaccination**

Representative flow cytometry plots showing the gating strategy applied to identify spike-specific CD4<sup>+</sup> and CD8<sup>+</sup> T cell responses to peptide pools post murine mRNA vaccination, representing wildtype SARS-CoV-2 (WT) or Omicron.

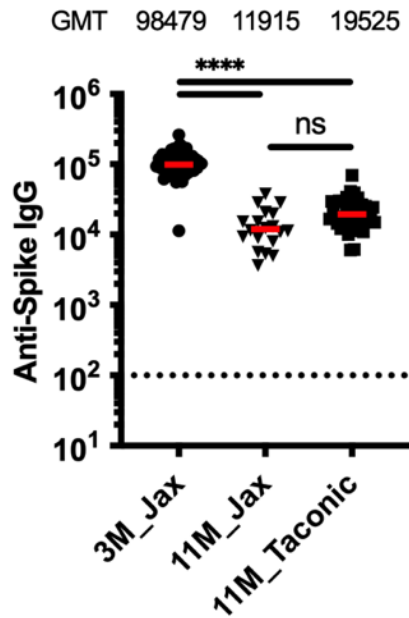

**Supplementary Figure 3. 11-month-old BALBc mice demonstrate similar anti-spike IgG responses after primary mRNA vaccination series**

3-month-old BALB/c mice acquired from the Jackson Laboratory (Jax) received primary mRNA vaccination series at either study week 0 at the age of 3-month ("3M\_Jax") or study week 32 at the age of 11-month ("11M\_Jax"). 11-month-old BALB/c mice acquired from Taconic and received primary vaccination series at study week 0 ("11M\_Taconic"). Sera were collected 2 weeks after primary vaccination series and anti-spike IgG titers were determined. Each symbol represents an individual sample and red horizontal lines and numbers represents geometric mean titers (GMTs). Dashed lines represent lower limit of detection. N=40, 39 and 19 per group for "3M\_Jax", "11M\_Jax", and "11M\_Taconic", respectively. Data were analyzed by Kruskal-Wallis test corrected for multiple comparisons. \*\*\*\*  $P < 0.0001$ .
